# Supplementary material for: Translating the WHO 25×25 goals into a UK context: the PROMISE modelling study
Source: PubMed Central journal article supplement — BMJ Open. 2017 Apr 4;7(4):e012805. doi: 10.1136/bmjopen-2016-012805 (PMC5387932; doi:10.1136/bmjopen-2016-012805), 2017-04-04
Supplement: bmjopen-2016-012805supp_appendix2.pdf [file bmjopen-2016-012805supp_appendix2.pdf]

## Appendix 2: Ideal risk scenario results

Table 1 Total non-communicable disease deaths and YLDs that are averted or delayed between 2010 and 2025, for the ideal risk scenario

|                         | 30-69 years                        |                                    | 70+ years                          |                                    |
|-------------------------|------------------------------------|------------------------------------|------------------------------------|------------------------------------|
|                         | Men                                | Women                              | Men                                | Women                              |
| <b>Deaths</b>           |                                    |                                    |                                    |                                    |
| Obesity                 | 63,000 (46,000 to 80,000)          | 26,000 (13,000 to 39,000)          | 230,000 (170,000 to 280,000)       | 170,000 (120,000 to 230,000)       |
| Tobacco use             | 88,000 (72,000 to 100,000)         | 61,000 (51,000 to 70,000)          | 360,000 (290,000 to 430,000)       | 290,000 (230,000 to 340,000)       |
| Diabetes                | 19,000 (16,000 to 23,000)          | 7,800 (6,300 to 9,200)             | 98,000 (80,000 to 120,000)         | 96,000 (78,000 to 110,000)         |
| Raised blood pressure   | 24,000 (23,000 to 25,000)          | 9,300 (8,600 to 10,000)            | 110,000 (100,000 to 110,000)       | 98,000 (92,000 to 100,000)         |
| Salt intake             | 24,000 (23,000 to 25,000)          | 6,200 (5,900 to 6,500)             | 95,000 (91,000 to 99,000)          | 62,000 (59,000 to 64,000)          |
| Harmful alcohol use     | 6,800 (-31,000 to 45,000)          | 20,000 (-2,300 to 43,000)          | -8,400 (-120,000 to 100,000)       | 72,000 (-170,000 to 320,000)       |
| Physical inactivity     | 10,000 (7,200 to 13,000)           | 3,700 (2,700 to 4,700)             | 48,000 (34,000 to 62,000)          | 42,000 (31,000 to 54,000)          |
| Combined scenario       | 190,000 (150,000 to 230,000)       | 94,000 (69,000 to 120,000)         | 800,000 (660,000 to 940,000)       | 640,000 (460,000 to 810,000)       |
| <b>YLDs (Thousands)</b> |                                    |                                    |                                    |                                    |
| Obesity                 | 390,000 (320,000 to 470,000)       | 320,000 (250,000 to 390,000)       | 720,000 (570,000 to 860,000)       | 640,000 (490,000 to 790,000)       |
| Tobacco use             | 770,000 (700,000 to 840,000)       | 860,000 (810,000 to 920,000)       | 1,300,000 (1,200,000 to 1,500,000) | 1,500,000 (1,400,000 to 1,600,000) |
| Diabetes                | 620,000 (610,000 to 630,000)       | 510,000 (510,000 to 520,000)       | 1,100,000 (1,000,000 to 1,100,000) | 990,000 (970,000 to 1,000,000)     |
| Raised blood pressure   | 75,000 (71,000 to 79,000)          | 51,000 (46,000 to 55,000)          | 170,000 (160,000 to 180,000)       | 130,000 (120,000 to 140,000)       |
| Salt intake             | 76,000 (72,000 to 79,000)          | 36,000 (34,000 to 37,000)          | 150,000 (150,000 to 160,000)       | 83,000 (80,000 to 87,000)          |
| Harmful alcohol use     | -82,000 (-260,000 to 100,000)      | -120,000 (-260,000 to 23,000)      | -120,000 (-410,000 to 170,000)     | -180,000 (-450,000 to 80,000)      |
| Physical inactivity     | 69,000 (58,000 to 80,000)          | 60,000 (51,000 to 70,000)          | 140,000 (120,000 to 170,000)       | 130,000 (110,000 to 160,000)       |
| Combined scenario       | 1,600,000 (1,500,000 to 1,700,000) | 1,500,000 (1,400,000 to 1,600,000) | 2,900,000 (2,700,000 to 3,100,000) | 2,800,000 (2,500,000 to 3,000,000) |

NB. Values are mean and 95% uncertainty intervals.
